# Supplementary material
Source: PubMed Central journal article supplement (PMC4625674)
Supplement: ASN.2014080846_ASN2014080846SupplementaryData.pdf [file ASN.2014080846_ASN2014080846SupplementaryData.pdf]

1 **Supplements**

2  
3 **The protease aPC ameliorates renal I/R-injury by restricting YB-1 ubiquitination**

4  
5 *Running title: aPC regulates YB-1 in renal IRI*

6  
7 Wei Dong<sup>1\*</sup>, Hongjie Wang<sup>1,2\*</sup>, Khurram Shahzad<sup>1,3\*</sup>, Fabian Bock<sup>1</sup>, Moh'd Mohanad Al-  
8 Dabet<sup>1</sup>, Satish Ranjan<sup>1</sup>, Juliane Wolter<sup>1</sup>, Shrey Kohli<sup>1</sup>, Juliane Hoffmann<sup>1</sup>, Vishnu Mukund  
9 Dhople<sup>4</sup>, Cheng Zhu<sup>5</sup>, Jonathan A. Lindquist<sup>5</sup>, Charles T. Esmon<sup>6</sup>, Elisabeth Gröne<sup>7</sup>,  
10 Herman-Josef Gröne<sup>7</sup>, Thati Madhusudhan<sup>1</sup>, Peter R. Mertens<sup>5\*</sup>, Dirk Schlüter<sup>8\*</sup>, Berend  
11 Isermann<sup>1\*</sup>

12  
13 \*these authors contributed equally to the manuscript.

14 <sup>1</sup> Institute of Clinical Chemistry and Pathobiochemistry, Medical Faculty, Otto-von-Guericke  
15 University Magdeburg, Magdeburg, Germany.

16 <sup>2</sup> Department of Cardiology, Tongji Hospital, Tongji Medical College, Huazhong University of  
17 Science and Technology, 430030 Wuhan, China.

18 <sup>3</sup> University of Health Sciences, Khayaban-e-Jamia Punjab, Lahore, Pakistan.

19 <sup>4</sup> Department of Functional Genomics, Interfaculty Institute for Genetics and Functional  
20 Genomics, University Medicine Greifswald, Germany.

21 <sup>5</sup> Department of Nephrology and Hypertension, Diabetes and Endocrinology, Otto-von-  
22 Guericke University, Magdeburg, Germany.

23 <sup>6</sup> Coagulation Biology Laboratory, Oklahoma Medical Research Foundation, University of  
24 Oklahoma Health Sciences Center, Oklahoma City, OK, USA.

25 <sup>7</sup> Department of Cellular and Molecular Pathology, German Cancer Research Center, 69120  
26 Heidelberg, Germany.

27 <sup>8</sup> Institute of Microbiology, Medical Faculty, Otto-von-Guericke University Magdeburg,  
28 Magdeburg, Germany.

29  
30  
31 **Content**

|    |                                     |         |
|----|-------------------------------------|---------|
| 32 | Supplementary materials and methods | page 1  |
| 33 | Supplementary Tables                | page 9  |
| 34 | References                          | page 10 |
| 35 | Supplementary Figures               | page 11 |

## 1 **Supplementary materials and methods**

### 3 **Materials**

4 The following antibodies were used in the current study: rabbit polyclonal antibody to  $\beta$ -actin,  
5 rabbit polyclonal antibody to YB-1, rabbit polyclonal antibody to OTUB1, mouse monoclonal  
6 antibody to ubiquitin, rabbit polyclonal antibody to K48-linkage specific polyubiquitin and  
7 rabbit isotype IgG (Cell Signaling Technology, Frankfurt, Germany); rat monoclonal antibody  
8 to EPCR (Sigma-Aldrich, Taufkirchen, Germany); rabbit polyclonal antibody to megalin,  
9 rabbit polyclonal antibody to HIF-1 $\alpha$ , mouse monoclonal antibody to PAR1, mouse  
10 monoclonal antibody to PAR2, rabbit polyclonal antibody to PAR3 and goat polyclonal  
11 antibody to PAR4 (Santacruz, Heidelberg, Germany); rabbit polyclonal antibody to KIM1,  
12 (Abcam, Cambridge, UK). The following HRP conjugated secondary antibodies were used:  
13 goat anti-rabbit IgG-HRP, rabbit anti-mouse IgG-HRP, rabbit anti-rat IgG-HRP, rabbit anti-  
14 goat IgG-HRP (Abcam, Cambridge, UK).

15 Other reagents used in the current study were: human plasma thrombin, MG132, DMEM,  
16 benzamidine and Bradford reagent, ANTI-FLAG<sup>®</sup> M2 Affinity Gel, antibiotic/antimycotic  
17 solution (10,000 units/ml penicillin, 0.1 mg/ml streptomycin, and 0.25  $\mu$ g/ml amphotericin B;  
18 A5955), APO transferrin, hydrocortisone, amphotericin B (Sigma-Aldrich, Taufkirchen,  
19 Germany); trypsin-EDTA, fetal bovine serum, heat inactivated horse serum,  
20 insulin/transferrin/selenium, DMEM/F12, PBS, HBSS, TRIZOL, Superscript III Reverse  
21 Transcriptase Kit, soybean trypsin inhibitor (Life Technologies, Darmstadt, Germany);  
22 interferon  $\gamma$  (Cell Sciences, Canton, MA); protease inhibitor cocktail (Roche diagnostics  
23 GmbH, Mannheim, Germany); BCA reagent, shRNA vectors for YB-1 and OTUB1,  
24 transfection reagent Turbofect (Thermo Fisher Scientific, Waltham, MA, USA); OTUB1 ORF  
25 overexpression construct (OriGene, Rockville, MD, USA); ZipTip C18, PVDF membrane and  
26 immobilion enhanced chemiluminescence reagent (Millipore GmbH, Germany);  
27 cycloheximide (New England Biolabs, Frankfurt, Germany); ketamine (Pfizer, Karlsruhe,  
28 Germany); xylazine (Bayer, Leverkusen, Germany); mouse PAR agonists and control  
29 peptides (Bachem, Weil am Rhein, Germany); mouse PAR1 agonist peptide (P1 AP2)  
30 (GenScript, Aachen, Germany); DAB substrate Kit for peroxidase (Vector Laboratories, CA,  
31 USA); Trypsin, GoTag PCR kit (Promega, Mannheim, Germany); protein A/G-agarose beads  
32 (Santacruz, Heidelberg, Germany); human protein C (CEPROTIN<sup>®</sup>) and Prothromplex  
33 NF600 (Baxter, Vienna, Austria); SPECTROZYME<sup>®</sup> PCa (LOXO, Heidelberg, Germany);  
34 collagenase (Worthington Biochemical Corp., Lakewood, N.J.); recombinant human  
35 epidermal growth factor (R&D Systems, Minneapolis, MN).

## 1 **Renal ischemia reperfusion injury model**

2 All mice were anesthetized with sodium ketamine (100 mg/kg body weight, i.p.) and xylazine  
3 (10 mg/kg body weight, i.p.). In preliminary experiments we determined that equal dosing  
4 was required and sufficient in the different genotypes. Mice were routinely observed during  
5 the post-operative recovery phase and no differences in the recovery time between the  
6 different genotypes were noticed.

7 Body temperature was maintained by placing the mice on a 37°C thermostatically controlled  
8 operating platform. Post-surgery mice were kept in a heated environment during the recovery  
9 phase.

10 The surgery procedure did not differ among the groups. Only age-matched mice were used.  
11 Body fluid was maintained in all mice by subcutaneous administration of 300 µL 0.9% normal  
12 saline pre-operatively. A midline abdominal incision was made and both kidneys were  
13 exposed. The main renal arteries and veins were identified using a stereotactic microscope  
14 (Olympus, Germany), and great care was taken to identify all vascular branches. All renal  
15 arteries and veins were then bilaterally occluded for 30 min with nontraumatic  
16 microaneurysm clamps (F.S.T Instruments, Germany). To help maintain thermoregulation  
17 during surgery, the intestine was relocated and the abdomen was temporarily closed with few  
18 stitches. After 30 min of renal ischemia the abdomen was reopened and the clamps were  
19 removed. The kidneys were inspected for at least 1 minute to ensure restoration of blood  
20 flow (as indicated by a pink color) and 0.5 ml of pre-warmed (37°C) normal saline was  
21 instilled into the abdominal cavity. The abdomen was closed with continuous 4-0  
22 polypropylene sutures. All animals received subcutaneous analgesic (buprenorphine 0.1  
23 mg/kg) at the end of surgery. Mice were placed in a temperature controlled (~35°C)  
24 environment during the recovery phase and regularly inspected. After full recovery animals  
25 were returned to their cages with free access to food and water. Sham surgery consisted of  
26 an identical procedure without application of the microaneurysm clamps. Animals were  
27 sacrificed 24h after renal ischemia reperfusion injury or sham surgery to obtain blood and  
28 tissue samples.

29

## 30 **Preparation of activated protein C**

31 Activated protein C was generated as previously described with slight modifications.<sup>1,2</sup>  
32 Briefly, prothrombin complex (Prothromplex NF600), containing all vitamin K dependent  
33 coagulation factors, was reconstituted with sterile water and supplemented with CaCl<sub>2</sub> at a  
34 final concentration of 20 mM. The column for purification of protein C was equilibrated at  
35 room temperature with 1 liter of washing buffer (0.1 M NaCl, 20 mM Tris, pH 7.5, 5 mM  
36 benzamidine HCl, 2 mM Ca<sup>2+</sup>, 0.02% sodium azide). The reconstituted prothombin complex  
37 was gravity eluted on a column filled with Affigel-10 resin covalently linked to a calcium-

1 dependent monoclonal antibody to PC (HPC4). The column was washed first with two  
2 column volumes of washing buffer and then two column volumes with a wash buffer rich in  
3 salt (0.5 M NaCl, 20 mM Tris, pH 7.5, 5 mM benzamidine HCl, 2 mM Ca<sup>2+</sup>, 0.02% sodium  
4 azide). Then the benzamidine was washed off the column with a buffer of 0.1 M NaCl, 20  
5 mM Tris, pH 7.5, 2 mM Ca<sup>2+</sup>, 0.02% sodium azide. To elute PC the column was gravity  
6 eluted with elution buffer (0.1 M NaCl, 20 mM Tris, pH 7.5, 5 mM EDTA, 0.02% sodium  
7 azide, pH 7.5) and 3 ml fractions were collected. The peak fractions were identified by  
8 measuring absorbance at 280 nm. The peak fractions were pooled. The recovered PC was  
9 activated with human plasma thrombin (5% w/w) and incubated for 3 h at 37°C. To isolate  
10 activated protein C (aPC) ion exchange chromatography with FPLC (ÄKTAFPLC®, GE  
11 Healthcare Life Sciences) was used. First, thrombin was removed with a cation exchange  
12 column MonoS (GE Healthcare Life Sciences). Then a MonoQ anion exchange column (GE  
13 Healthcare Life Sciences) was equilibrated with 10% of a 20 mM Tris, pH 7.5, 1 M NaCl  
14 buffer. After applying the solution that contains aPC a 10-100% gradient of a 20 mM Tris, pH  
15 7.5, 1 M NaCl buffer was run through the column to elute aPC at a flow of 1-2 ml/min under  
16 continuous monitoring of OD and conductivity. APC eluted at ~36 mS/cm by conductivity or  
17 at 40% of the buffer. Fractions of 0.5 ml were collected during the peak and pooled.  
18 Proteolytic activity of purified aPC was ascertained with the chromogenic substrate  
19 SPECTROZYME® PCa.

20

### 21 ***In vivo* aPC capture assay**

22 Mice were anesthetized (sodium ketamine, 100 mg/kg body weight, i.p., and xylazine 10  
23 mg/kg body weight, i.p.) and injected *via* the tail vein with human PC (20 µg in a final volume  
24 of 100 µl 1xPBS) or 1xPBS (100 µl) per mouse. After 10 min blood samples were collected  
25 from the vena cava into 0.38% sodium citrate and 50 mM benzamidine HCl (final  
26 concentrations). Human aPC was captured from these plasma samples using an antibody  
27 highly specific for human aPC (HAPC 1555), and the activity of the captured human protein  
28 C was determined using the chromogenic substrate SPECTROZYME® PCa as previously  
29 described.<sup>3</sup>

30

### 31 **Determination of serum BUN and creatinine**

32 Mice were anesthetized 24h after reperfusion with sodium ketamine (100 mg/kg body weight,  
33 i.p.) and xylazine (10 mg/kg body weight, i.p.) and sacrificed. Blood samples were obtained  
34 from the abdominal vena cava and collected into tubes pre-filled with sodium citrate (final  
35 concentration 0.38%). Plasma was obtained by centrifugation at 2000g for 10 min. Renal  
36 dysfunction was evaluated by measuring serum levels of blood urea nitrogen (BUN) and  
37 creatinine according to the manufacturer's instructions. Serum BUN was measured using a

1 kinetic test kit with urease (Roche Diagnostics, Cobas c501 module) and creatinine was  
2 determined by an enzymatic based kit (Roche Diagnostics, Cobas c501 module) in the  
3 Institute of Clinical Chemistry and Pathobiochemistry, medical faculty, Otto-von-Guericke  
4 University, Magdeburg, Germany. <sup>4</sup>

## 6 **Histology and immunohistochemistry**

7 Sacrificed mice were perfused with ice-cold PBS and then with 4% buffered  
8 paraformaldehyde. Tissues were further fixed in 4% buffered paraformaldehyde for 2 days at  
9 4°C, embedded in paraffin and processed for sectioning. Kidney injury was evaluated using  
10 hematoxylin and eosin stained histological sections. Images of the outer third of the kidney  
11 sections were randomly chosen and captured using an Olympus Bx43 Microscope (Olympus,  
12 Hamburg, Germany). All tubuli within an image were individually scored on a scale of 0-4  
13 based on the cellular damage as indicated by morphological signs of cell-swelling and  
14 tubular dilatation.<sup>5</sup> The following scores were assigned: 0 – no cellular or tubular damage  
15 visible; 1 – damage visible, but less than 25% of the tubuli affected; 2 – 25% to 50% tubular  
16 damage; 3 – 50% to 75% tubular damage; and 4 – more than 75% damage. At least 5  
17 random images per mouse and at least 5 mice per group were included into each group.

18 Immunohistochemical analyses of YB-1 and OTUB1 was conducted essentially as previously  
19 described.<sup>3</sup> Paraffin embedded tissue sections were deparaffinised and rehydrated,  
20 incubated with a specific primary antibody (1 h, at room temperature), washed 3 times with  
21 PBS, and incubated with an appropriate, horseradish peroxidase-conjugated secondary  
22 antibody. Peroxidase activity was detected using a DAB substrate (3,3'-diaminobenzidine)  
23 and slides were counterstained with hematoxylin.<sup>3</sup> Control images were obtained following  
24 incubation with a non-specific primary antibody and were used for background correction. All  
25 histological analyses were done by two independent blinded investigators. Images were  
26 obtained using an Olympus Bx43 Microscope (Olympus, Hamburg, Germany) at 20x or 40x  
27 magnification.

## 29 **Analyses of human tissue samples**

30 Paraffin sections of human kidney biopsies obtained from patients with acute renal failure  
31 were scored for the severity of tubular injury (H.J.G.). YB-1 staining was done by a blinded  
32 investigator (K.S.) and staining intensity was scored by two independent and blinded  
33 investigators (W.D. and H.W). Control sections were obtained from patients undergoing  
34 tumor nephrectomy, but without any other renal disease. All patients and controls were  
35 Caucasian. The study complied with the Declaration of Helsinki. Tissue samples were  
36 collected according to the guidelines of the local ethics committees after giving written  
37 informed consent (Ethic-Committee-No: 068/1999). Immunohistochemical staining was

1 essentially performed as outlined above using a rabbit anti-YB1 antibody (primary antibody,  
2 abcam, ab12148) and a TRITC labelled polyclonal anti-rabbit antibody (secondary antibody,  
3 Dako R0156). Sections were counterstained with DAPI.

#### 4 5 **Cell culture**

6 BUMPT cells were routinely cultured in DMEM containing 10% FBS and maintained at 33°C  
7 in the presence of interferon  $\gamma$  (10 U/ml) to enhance expression of a thermosensitive T  
8 antigen.<sup>6</sup> Under these conditions cells remain undifferentiated and proliferate. To induce  
9 differentiation, BUMPT cells were grown for 2 days at 37°C in the same medium without  
10 interferon  $\gamma$ . Differentiation was ascertained by expression of Na<sup>+</sup>/glucose transporter and  
11 megalin, both specific markers of proximal tubular cells. Only differentiated cells were used  
12 for hypoxia and reoxygenation experiments.

13 Mouse primary renal proximal tubular epithelial cells (rTEC) were isolated by using a  
14 modification of previously described methods<sup>7,8</sup>. Mice were scarified by cervical dislocation.  
15 Kidneys were immediately removed and placed in cold (4 °C) Hanks Balanced Salt Solution  
16 (HBSS) (Life Technologies, Germany) with 1% antibiotic/antimycotic additive (Sigma-Aldrich,  
17 Germany). After removal of renal capsules kidneys were bisected and the renal medulla was  
18 discarded. The remaining cortical tissue was minced and transferred to 10 ml HBSS  
19 containing collagenase (200 units/ml; Worthington Biochemical Corp., Lakewood, N.J.) and  
20 Soybean Trypsin Inhibitor (0.5mg/ml, Life Technologies, Germany). The tubuli containing  
21 suspension was incubated (37 °C, 70 rpm) for 15 minutes, re-suspended with a 10 ml pipette,  
22 and incubated again for 15 minutes. Following digestion the suspension from each kidney  
23 was re-suspended again and then distributed into two 15 ml conical tubes (two tubes with ~5  
24 ml each per kidney). Density sedimentation with horse serum was used to inactivate  
25 enzymes and enrich for rTECs. To accomplish this, 5 ml of sterile, heat inactivated horse  
26 serum (Life Technologies, Germany) was added to each tube and the tube was vortexed for  
27 30 seconds. After sedimentation of tissue remnants for 1 minute the supernatant containing  
28 the rTECs was transferred to another tube and centrifuged (7 minutes, 200xg). The cell pellet  
29 was washed once with 10 ml of HBSS and centrifuged (200xg, 7 minutes). The supernatant  
30 was discarded and the rTECs isolated from one kidney were re-suspended and pooled in 60  
31 ml of DMEM/F-12 culture media (Life Technologies, Germany) containing insulin/ transferrin/  
32 selenium (5  $\mu$ g/ml, 2.75  $\mu$ g/ml, and 3.35 ng/ml, respectively, Life Technologies, Germany),  
33 APO transferrin (2.0  $\mu$ g/ml), hydrocortisone (40 ng/ml, Sigma-Aldrich, Germany),  
34 recombinant human epidermal growth factor (rhEGF, 0.01  $\mu$ g/ml, R&D Systems,  
35 Minneapolis, MN), and 1% antibiotic/antimycotic solution (10,000 units/ml penicillin, 0.1  
36 mg/ml streptomycin, 0.25  $\mu$ g/ml amphotericin B, Sigma-Aldrich Germany). rTECs were  
37 incubated at 37 °C with 5% CO<sub>2</sub>. Culture media was replaced initially after 24 hours and

1 subsequently every 48–72 hours using DMEM/F-12 without rhEGF. By staining cells for  
2 megalin a purity of at least 95% was confirmed. For routine passage cells were rinsed with a  
3 calcium- and magnesium-free PBS and exposed to trypsin (0.05%)-EDTA (Life  
4 Technologies, Germany) for 1 min. rTEC cells were grown in 12-well or P-100 dishes and  
5 experiments conducted at confluence.

### 6 7 ***In vitro* hypoxia and reoxygenation model**

8 Hypoxia and reoxygenation of BUMPT cells and rTECs was conducted as previously  
9 described.<sup>9</sup> Differentiated and 80% confluent BUMPT cells or rTECs were serum deprived  
10 overnight (0.5% FBS). For hypoxia injury cells were kept in HBSS (Life Technologies,  
11 Darmstadt, Germany) in a hypoxic atmosphere containing 1% O<sub>2</sub>, 94% N<sub>2</sub>, 5% CO<sub>2</sub>. A  
12 hypoxia chamber (Stemcell, Grenoble, France) was used to maintain cells under hypoxic  
13 conditions. After 6 h hypoxia cells were returned to complete medium and 21% O<sub>2</sub>  
14 (“reoxygenation” period). As controls we used cells which were likewise serum-starved and  
15 maintained in HBSS for 6 h, but these cells were continuously maintained at 21% O<sub>2</sub>. Cells  
16 were harvested for RNA and protein isolation at various time-points after reoxygenation. In a  
17 subset of experiments cells were pre-treated (30 min before hypoxia) with aPC (20 nM), the  
18 protein biosynthesis inhibitor cycloheximide (10 µg/ml), the proteasome inhibitor MG132 (10  
19 µM), PAR1, PAR2, PAR3, or PAR4 agonist peptide or control peptide (each 10 µM, see  
20 Supplementary Table S1), or blocking antibodies towards PAR1, PAR2, PAR3, PAR4, or  
21 EPCR (each 20 µg/ml). Two different PAR-1 activating peptides were used, corresponding to  
22 the thrombin-specific tethered ligand (P1 AP2, TFLLR) or the aPC-specific tethered ligand  
23 (P1 AP1, NPNDKYEPFWEDEEKNESGL). In all cases cells were pre-treated for 30 min. All  
24 concentrations are final concentrations in the cell-culture medium.

### 25 26 **Proteomics**

27 We transfected BUMPT cells with a flag-tagged YB-1 overexpression construct or an  
28 appropriate control construct. Cells were lysed 24h after transfection in RIPA buffer and  
29 protein complexes were pulled down with an ANTI-FLAG<sup>®</sup> M2 Affinity Gel.  
30 Immunoprecipitated samples were diluted with 50mM ABC (ammonium bicarbonate) and  
31 then reduced with 25 mM DTT (dithiothreitol) in 20mM ABC for 60 min at 60°C. This was  
32 followed by alkylation using 100 mM of IA (2-Iodoacetamide) in 20 mM ABC for 30 min at  
33 37°C in dark. These modified proteins were digested using trypsin 20 ng/µl for 15-16 h by  
34 incubating at 37°C. The digestion was stopped using 1% acetic acid and samples were  
35 purified using ZipTip C18 (Millipore Corp., Billerica, MA, USA). This mixture was subjected to  
36 LC-MS/MS analysis. The digested peptides were first enriched on a nanoAcquity UPLC 2G-  
37 V/Mtrap Symmetry C18 pre-column (2 cm length, 180 µm inner diameter and 5 µm particle

1 size) from Water Corporation and separated using NanoAcquity BEH130 C18 column (10 cm  
2 length, 100  $\mu$ M inner diameter and 1.7  $\mu$ m particle size from Water Corporation) on a  
3 nanoAcquity UPLC. The separation was achieved by the formation of a linear gradient over  
4 92 min using buffer A (2% acetonitrile, 2% DMSO in water with 0.1% acetic acid) and buffer  
5 B (5% DMSO in acetonitrile with 0.1% acetic acid; gradient: 1-5% buffer B in 2 min, 5-25% B  
6 in 63 min, 25-60% B in 25 min, 60-99% B in 2 min). The peptides were eluted at a flow rate  
7 of 400 nL/ min and were analyzed using LTQ-Orbitrap Velos mass spectrometer (Thermo  
8 Electron Corporation, Germany) equipped with a nano-ESI source installed with a Picotip  
9 Emmitter (New Objective, USA).

10 The MS was operated in positive mode and in data-dependent mode to automatically switch  
11 between Orbitrap-MS and LTQ-MS/MS acquisition. Survey full scan MS spectra (from  $m/z$   
12 300 to 1700) were acquired in the Orbitrap with resolution,  $R=30\ 000$  with a target value of 1  
13  $\times E6$ . The method allowed sequential isolation of the twenty most intense ions depending on  
14 signal intensity and were subjected for CID fragmentation with an isolation width of 2 Da and  
15 a target value of 3  $\times E4$  or with a maximum ion time of 100 ms. Target ions already selected  
16 for MS/MS were dynamically excluded for 60 s. General MS conditions were electrospray  
17 voltage, 1.7 kV; no sheath and auxiliary gas flow, capillary temperature of 300°C. Ion  
18 selection threshold was 2000 counts for MS/MS, activation time of 10 ms, and activation  
19 energy of 35% normalized were also applied for MS/MS. Only doubly and triply charged ions  
20 were triggered for tandem MS analysis.

21 The raw data acquired on the MS instrument was further analysed for protein identifications  
22 using Proteome Discoverer 1.4.1.14 (Thermo Scientific, USA). The MS spectral data was  
23 searched against human FASTA formatted Uniprot/SwissProt database using SequestHT  
24 algorithm. Database searches were performed with carbamidomethylation on cysteine as  
25 fixed modification and oxidation on methionine as variable modification. Enzyme specificity  
26 was selected to trypsin with up to two missed cleavages allowed using 10 ppm peptide ion  
27 and 0.8 Da MS/MS tolerances.<sup>10</sup> Peptides with a false discovery rate (FDR) of less than 1%  
28 were accepted and estimated by Percolator. Gene ontology (GO) classification and location,  
29 biological process, and molecular function was performed using ProteinCenter software  
30 (Thermo Scientific).

31

### 32 **Immunoblotting and Immunoprecipitation**

33 Following deep anaesthesia and before perfusion of animals the renal artery and vein of one  
34 kidney was ligated, then removed and flash frozen in liquid nitrogen for protein and RNA  
35 isolation. Proteins were isolated using RIPA buffer and the concentration was determined  
36 using the BCA protein assay (Thermo Fisher Scientific, Waltham, MA, USA).



1 Kidney and cell extracts were separated by SDS/PAGE and transferred to PVDF membranes.  
2 Membranes were blocked in Tris-buffered saline with 0.1% Tween 20 with 5% non-fat dry  
3 milk or bovine serum albumin. Membranes were incubated with appropriate primary  
4 antibodies overnight at 4°C. After washing 5 times with 1 x TBS-T membranes were  
5 incubated with an appropriate secondary peroxidase-conjugated antibody, and  
6 immunoreactive proteins were visualized using an enhanced chemiluminescence system  
7 (Millipore, Darmstadt, Germany). For Immunoprecipitation, protein lysates were precleared  
8 with protein A/G-agarose beads to reduce non-specific binding. Cleared protein lysates were  
9 incubated with anti-YB-1 or irrelevant IgG antibodies. Antigen-antibody complexes were  
10 precipitated following incubation with protein A/G-agarose beads at 4°C overnight by  
11 centrifugation, and washed in cold lysis buffer (RIPA-buffer). The precipitates were boiled for  
12 5 min in SDS loading buffer and subjected to immunoblotting.<sup>11</sup>

13

#### 14 **RT-PCR**

15 Kidney tissue was thawed on ice and transferred into TRIZOL (Life Technologies, Darmstadt,  
16 Germany) for isolation of total RNA following the manufacturer's protocol. Quality of total  
17 RNA was ensured on an agarose gel and by analyses of the A260/280 ratio. The reverse  
18 transcription reaction was conducted with 1 µg of total RNA using the Super Script reagents  
19 and oligo(dT) primers (Life Technologies, Darmstadt, Germany). cDNA was amplified using  
20 the primers listed in the Supplementary Table S2.

21

22

1 **Supplementary Tables**

2

| <b>Name</b>                                    | <b>Abbreviation</b> | <b>Peptide sequence</b> |
|------------------------------------------------|---------------------|-------------------------|
| <b>PAR1 agonist peptide (aPC)</b>              | P1 AP1              | NPNDKYEPFWEDEEKNESGL    |
| <b>PAR1 agonist peptide (aPC) control</b>      | CON P1              | GDENENEKPNWYELKEPDSF    |
| <b>PAR1 agonist peptide (thrombin)</b>         | P1 AP2              | TFLLR                   |
| <b>PAR1 agonist peptide (thrombin) control</b> | CON P1              | RLLFT                   |
| <b>PAR2 agonist peptide</b>                    | P2 AP               | SLIGRL                  |
| <b>PAR2 agonist peptide control</b>            | CON P2              | LSIGRL                  |
| <b>PAR3 agonist peptide</b>                    | P3 AP               | SFNGGP                  |
| <b>PAR3 agonist peptide control</b>            | CON P3              | FSNGGP                  |
| <b>PAR4 agonist peptide</b>                    | P4 AP               | AYPGKF                  |
| <b>PAR4 agonist peptide control</b>            | CON P4              | YAPGKF                  |

3 **Supplementary Table S1: PAR agonist peptides and control peptides sequences**

4  
5  
6  
7  
8

| <b>Gene</b>     | <b>Forward</b>               | <b>Reverse</b>              |
|-----------------|------------------------------|-----------------------------|
| <b>mPAR1</b>    | 5' CCGGCACTGATTGGCAGTT 3'    | 5' GACTGGATCGGATACACCACC 3' |
| <b>mPAR2</b>    | 5' CACCACCTGCCACGATGT 3'     | 5' CGATTCACAGTGCGGACAC 3'   |
| <b>mPAR3</b>    | 5' ATGGGCATCAACCGCTAC 3'     | 5' GCTGTCGGTATTGTGGTAG 3'   |
| <b>mPAR4</b>    | 5' AACGCCTCACTACTGGACTCT 3'  | 5' GAGCCAGCTAATCGGAAGGTC 3' |
| <b>mEPCR</b>    | 5' AATGCCTACAACCGGACTCG 3'   | 5' ACCAGTGATGTGTAAGAGCGA 3' |
| <b>mβ-actin</b> | 5'CCGTAAAGACCTCTATGCCAACA 3' | 5' CGGACTCATCGTACTCCTGCT 3' |

9 **Supplementary Table S2: Sequences of mouse primers used within the current study.**

10  
11  
12  
13  
14

## References:

1. Esmon, CT, Esmon, NL, Le Bonniec, BF, Johnson, AE: Protein C activation. *Methods in enzymology*, 222: 359-385, 1993.
2. Taylor, FB, Jr., Chang, A, Esmon, CT, D'Angelo, A, Viganò-D'Angelo, S, Blick, KE: Protein C prevents the coagulopathic and lethal effects of *Escherichia coli* infusion in the baboon. *The Journal of clinical investigation*, 79: 918-925, 1987.
3. Isermann, B, Vinnikov, IA, Madhusudhan, T, Herzog, S, Kashif, M, Blautzik, J, Corat, MA, Zeier, M, Blessing, E, Oh, J, Gerlitz, B, Berg, DT, Grinnell, BW, Chavakis, T, Esmon, CT, Weiler, H, Bierhaus, A, Nawroth, PP: Activated protein C protects against diabetic nephropathy by inhibiting endothelial and podocyte apoptosis. *Nature medicine*, 13: 1349-1358, 2007.
4. Lima-Oliveira, G, Lippi, G, Salvagno, GL, Danese, E, Montagnana, M, Brocco, G, Voi, M, Picheth, G, Guidi, GC: Does laboratory automation for the preanalytical phase improve data quality? *Journal of laboratory automation*, 18: 375-381, 2013.
5. Fan, H, Yang, HC, You, L, Wang, YY, He, WJ, Hao, CM: The histone deacetylase, SIRT1, contributes to the resistance of young mice to ischemia/reperfusion-induced acute kidney injury. *Kidney international*, 83: 404-413, 2013.
6. Sinha, D, Wang, Z, Price, VR, Schwartz, JH, Lieberthal, W: Chemical anoxia of tubular cells induces activation of c-*Src* and its translocation to the zonula adherens. *American journal of physiology Renal physiology*, 284: F488-497, 2003.
7. Sheridan, AM, Schwartz, JH, Kroshian, VM, Tercyak, AM, Laraia, J, Masino, S, Lieberthal, W: Renal mouse proximal tubular cells are more susceptible than MDCK cells to chemical anoxia. *The American journal of physiology*, 265: F342-350, 1993.
8. Breggia, AC, Himmelfarb, J: Primary mouse renal tubular epithelial cells have variable injury tolerance to ischemic and chemical mediators of oxidative stress. *Oxidative medicine and cellular longevity*, 1: 33-38, 2008.
9. Conde, E, Alegre, L, Blanco-Sanchez, I, Saenz-Morales, D, Aguado-Fraile, E, Ponte, B, Ramos, E, Saiz, A, Jimenez, C, Ordonez, A, Lopez-Cabrera, M, del Peso, L, de Landazuri, MO, Liano, F, Selgas, R, Sanchez-Tomero, JA, Garcia-Bermejo, ML: Hypoxia inducible factor 1-alpha (HIF-1 alpha) is induced during reperfusion after renal ischemia and is critical for proximal tubule cell survival. *PloS one*, 7: e33258, 2012.
10. Jehmlich, N, Golatowski, C, Murr, A, Salazar, G, Dhople, VM, Hammer, E, Volker, U: Comparative evaluation of peptide desalting methods for salivary proteome analysis. *Clinica chimica acta; international journal of clinical chemistry*, 434: 16-20, 2014.
11. Madhusudhan, T, Wang, H, Straub, BK, Grone, E, Zhou, Q, Shahzad, K, Muller-Krebs, S, Schwenger, V, Gerlitz, B, Grinnell, BW, Griffin, JH, Reiser, J, Grone, HJ, Esmon, CT, Nawroth, PP, Isermann, B: Cytoprotective signaling by activated protein C requires protease-activated receptor-3 in podocytes. *Blood*, 119: 874-883, 2012.

# Figure S1

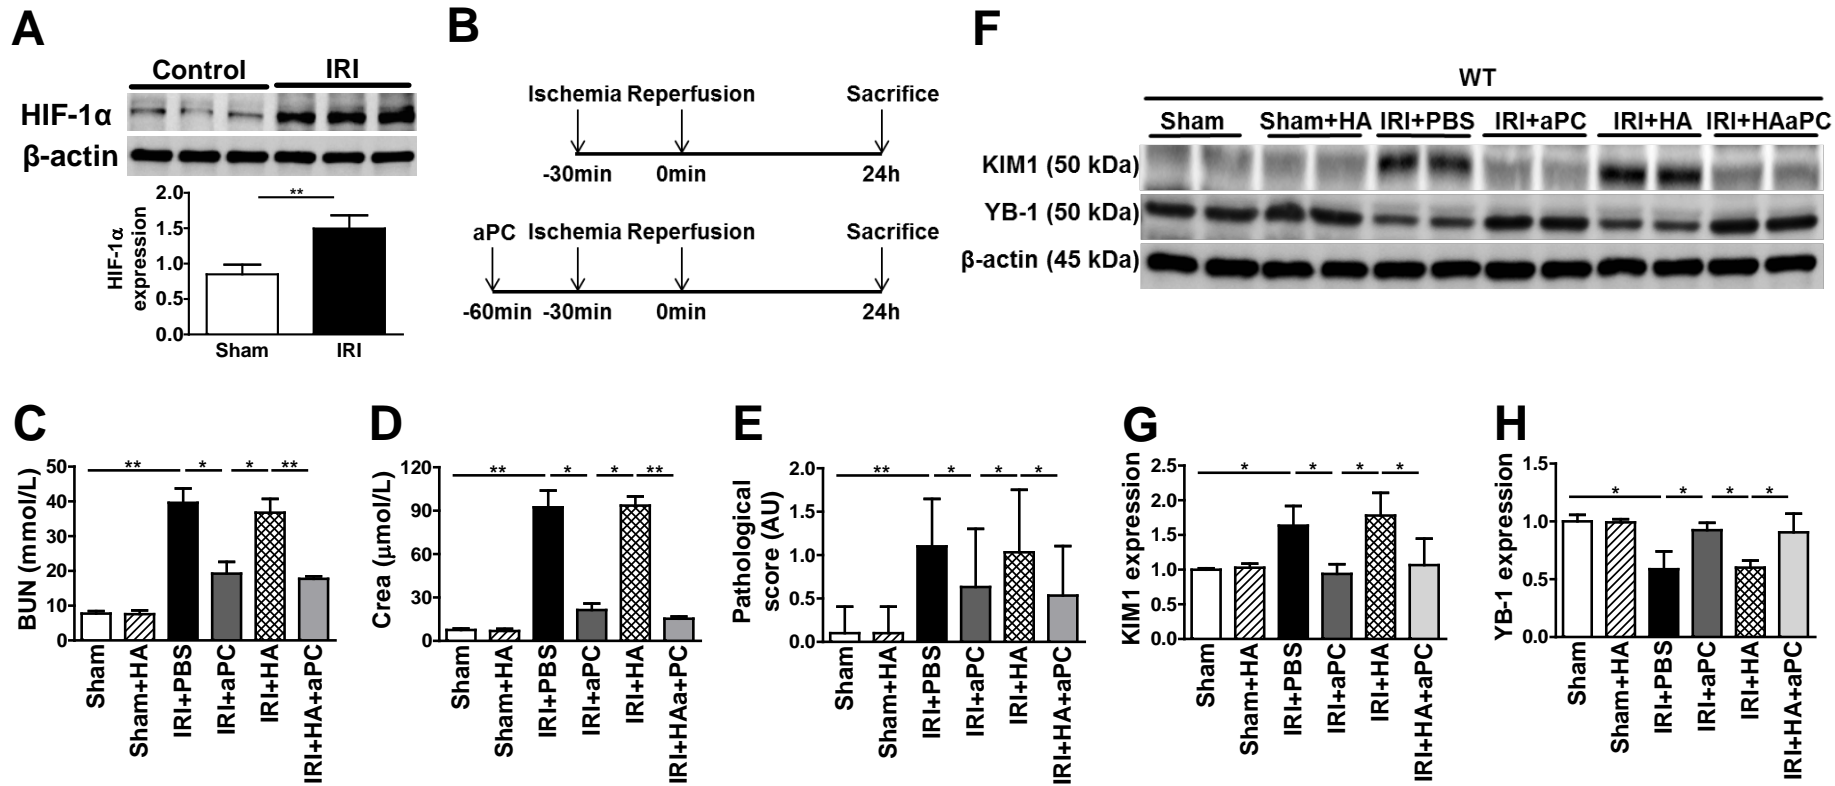

## Figure S1: aPC's protective effect in renal IRI is independent of its anticoagulant function

**A:** Efficient hypoxic stress was ascertained by determining HIF-1α expression in renal cortex extracts. Exemplary immunoblot of HIF-1α (132 kDa) and β-actin (loading control, 45 kDa) and bar graph summarizing results.

**B:** Scheme of the murine renal IRI model. Renal pedicles were bilaterally occluded for 30 min (ischemia) and the mice were sacrificed 24h after reperfusion. In a subset of mice aPC (0.5 mg/kg body weight i.p.) was administered 30 min prior to renal ischemia (bottom).

**C-E:** Serum urea nitrogen (BUN, C), creatinine (Crea, D), and pathological score (E) in control (sham, open bars), experimental (ischemia reperfusion injury, IRI+PBS, black bars), and wild type IRI mice receiving either aPC (0.5 mg/kg aPC, dark grey, IRI+aPC) or aPC (0.5 mg/kg) pre-incubated with the HAPC1573 antibody (light grey bars, IRI+HA+aPC). Treatment with the antibody HAPC1573 alone has no impact in sham (Sham+HA, striated) or IRI (IRI+HA, chequered) wild-type mice on these parameters.

**F-H:** Treatment of wild-type IRI mice with aPC or aPC–HAPC1573 complex (0.5 mg/kg) efficiently diminished KIM1 expression while preserving YB-1 levels; representative immunoblots (F) of kidney lysates obtained from control (Sham, open bars), IRI (black), and IRI mice treated with aPC (dark grey) or the aPC–HAPC1573 (light grey) complex. The antibody HAPC1573 itself has not impact on KIM1 or YB-1 expression in wild-type sham (Sham+HA, striated) or IRI (IRI+HA, chequered) mice. Bar graphs (G, H) summarizing results.

Bar graphs representing mean value ± SD of at least 6 mice per group (B, C, D); \**P*<0.05, \*\**P*<0.01 (ANOVA).

# Figure S2

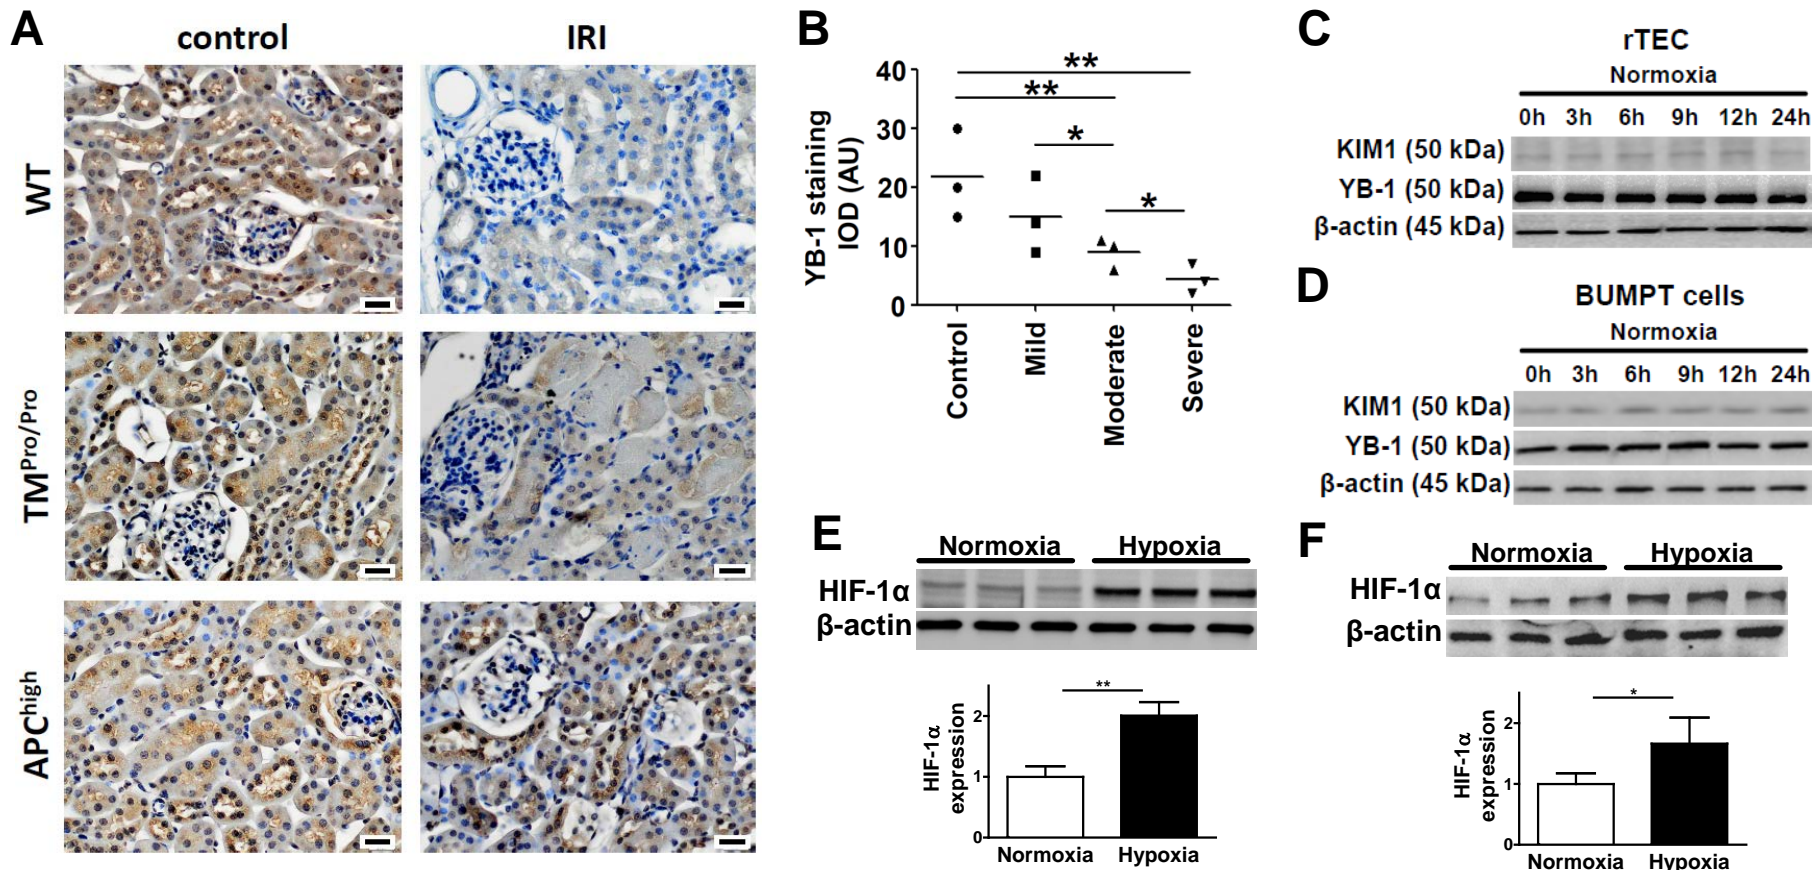

**Figure S2: Loss of YB-1 expression following acute renal injury in mice and humans**

**A:** Following IRI tubular YB-1 expression is diminished in WT and  $TM^{Pro/Pro}$ , but not in  $APC^{high}$  mice. Exemplary immunohistochemical images of renal paraffin embedded tissue sections obtained from control (sham-operated) or IRI mice. YB-1 antigen detected by HRP-DAB reaction (brown), hematoxylin counterstain (blue); scale bar: 20  $\mu m$ .

**B:** Dot blot summarizing results of YB-1 expression in human renal biopsies of patients with acute renal injury graded as mild, moderate, or severe by an experienced pathologists. Expression of YB-1, determined by immunohistochemical analyses, declines with an increasing severity of acute renal injury. Dot blot corresponding to the exemplary immunohistochemical images shown in Figure 2B;  $\star$ :  $P < 0.05$ ,  $\star\star$ :  $P < 0.01$  (Wilcoxon-Mann-Whitney-test).

**C,D:** Expression of KIM1 and YB-1 remains stable under normoxic conditions in primary rTEC (C) and BUMPT (D) cells. Representative immunoblots of three repeat experiments.

**E,F:** Efficient hypoxic stress was ascertained by determining HIF-1 $\alpha$  expression in cell lysates of BUMPT cells (E) and rTECs (F). Exemplary immunoblot of HIF-1 $\alpha$  (132 kDa) and  $\beta$ -actin (45 kDa, loading control) and bar graph summarizing results of three independent repeat experiments (each in triplicates).

# Figure S3

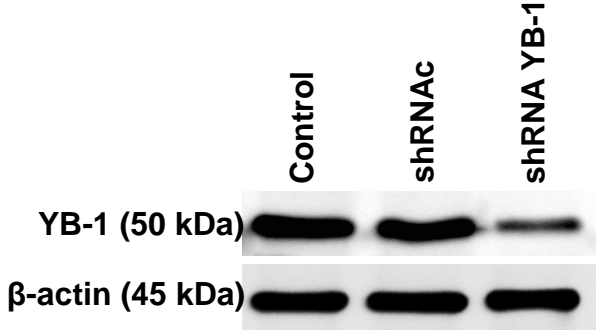

### Figure S3: YB-1 knock down in tubular cells

Immunoblot of non-transfected tubular (BUMPT) cells and BUMPT cells stably transfected with non-specific control shRNA (shRNAC) or YB-1 specific RNA (shRNA YB-1). Exemplary immunoblot, showing reduced YB-1 expression in shRNA YB-1 cells; β-actin as loading control.

# Figure S4

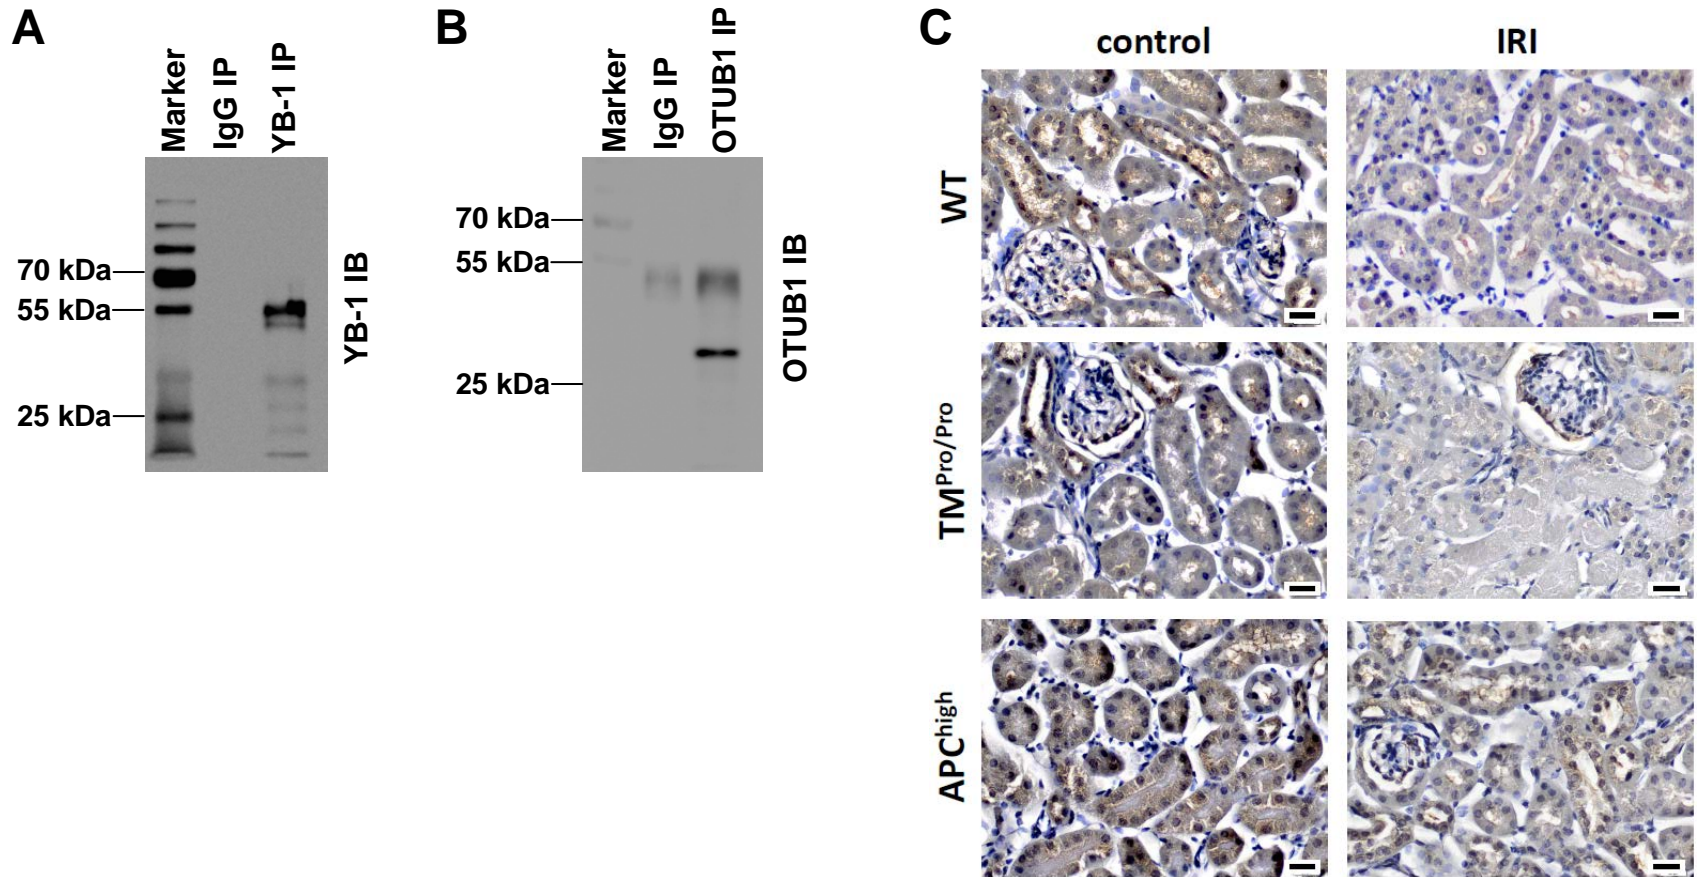

**Figure S4: IgG controls for immunoprecipitation experiments and OTUB1 expression in renal tissue**

**A:** Immunoblotting of YB-1 (YB-1 IB) following immunoprecipitation using antibodies against YB-1 or IgG control (IgG IP) from whole cell lysates of control mouse tubular cells.

**B:** Immunoblotting of OTUB1 (OTUB1 IB) following immunoprecipitation using antibodies against OTUB1 or IgG control (IgG IP) from whole cell lysates of control mouse tubular cells.

**C:** Following IRI tubular OTUB1 expression is diminished in WT and TM<sup>Pro/Pro</sup>, but not in APC<sup>high</sup> mice. Exemplary immunohistochemical images of renal paraffin embedded tissue sections obtained from control (sham-operated) or IRI mice. OTUB1 antigen detected by HRP-DAB reaction (brown); hematoxylin counterstain (blue); scale bar: 20  $\mu$ m.

# Figure S5

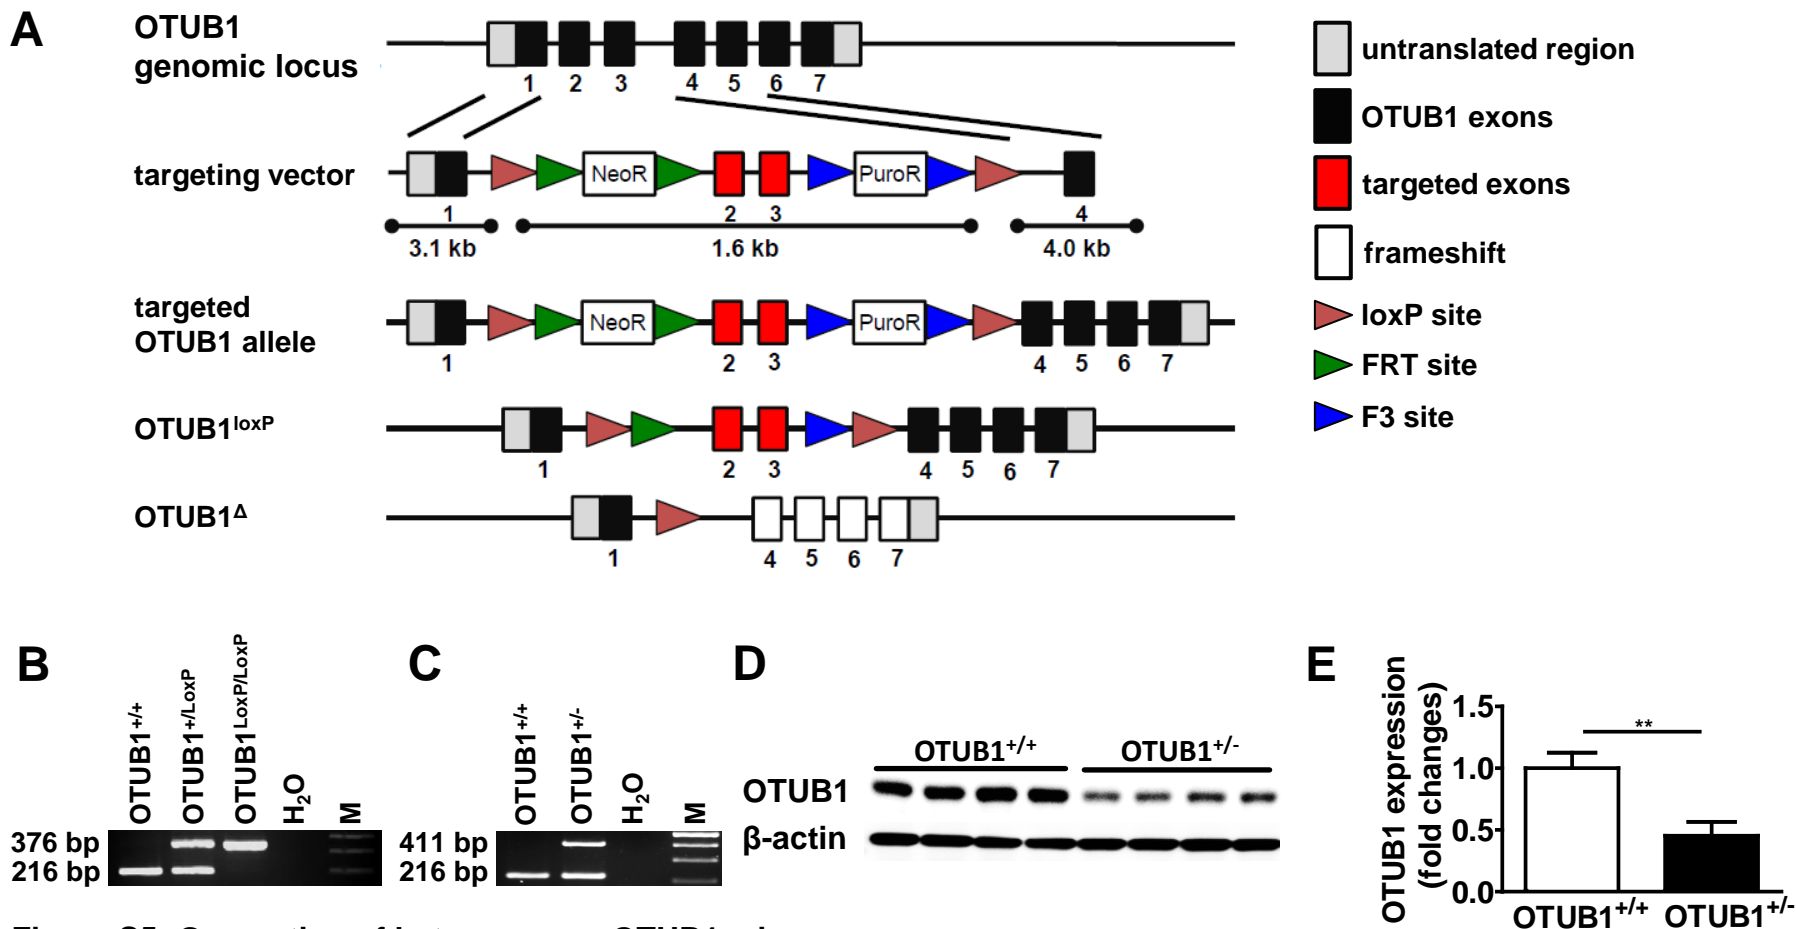

## Figure S5: Generation of heterozygous OTUB1 mice

**A:** Schematic representation of the gene targeting strategy to obtain heterozygous OTUB1 mice. Initially, a targeting construct containing a NeoR and PuroR expression cassette flanking exon 2 and 3 of the OTUB1 gene and two loxP-sites was generated and used to target murine embryonic stem cells. The NeoR and PuroR cassettes were removed by flp-mediated recombination, yielding OTUB1<sup>LoxP</sup> mice. Subsequently, exon 2 and 3 were removed by breeding heterozygous OTUB1<sup>LoxP</sup> mice with C57BL/6 Rosa 26-Cre<sup>+/-</sup> mice, resulting in germline inactivation of one OTUB1 allele. **B:** PCR of tail DNA from the indicated mice showing a 216 bp band in case of OTUB1<sup>+/+</sup>, a 216 and a 376 bp band in case of heterozygous OTUB1<sup>+/LoxP</sup>, and a 376 bp band in case of OTUB1<sup>LoxP/LoxP</sup> mice. **C:** Standard PCR of tail DNA obtained from OTUB1<sup>+/+</sup> mice (216 bp) or OTUB1<sup>+/-</sup> (411 bp) mice. **D,E:** Exemplary immunoblot showing OTUB1 expression in renal cortex samples obtained from OTUB1<sup>+/+</sup> and OTUB1<sup>+/-</sup> mice (D) and bar graph summarizing results of 8 mice per group (E); mean  $\pm$  SD; *t*-test, \*\**P* < 0.01.



# Figure S6

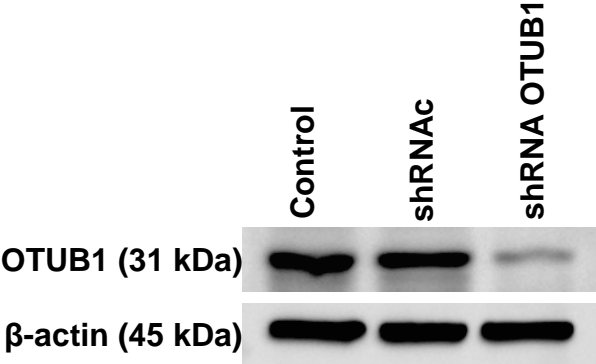

### Figure S6: OTUB1 knock down in tubular cells

Immunoblot of non-transfected tubular (BUMPT) cells and BUMPT cells stably transfected with non-specific control shRNA (shRNAC) or OTUB1 specific RNA (shRNA OTUB1). Exemplary immunoblot, showing reduced OTUB1 expression in shRNA OTUB1 cells; β-actin as loading control.
